# Supplementary material
Source: MDPI journal article supplement (https://www.mdpi.com/2071-1050/13/18/10000)
Supplement: s1 [file s1]

## Supplementary materials

### Supplementary material 1 List of policy forums for sample definition

- (1) The provincial land use map revision committee, established by Provincial Decree 3749/14 (in Spanish: *Consejo Asesor de Revision de OTBN*);
- (2) The provincial committee for silvopastoral forest management, established by Provincial Decree 588/17 (*Consejo Asesor de Manejo de Bosques con Ganaderia Integrada*);
- (3) The advisory committee of the “native forest and community” project (*Bosques Nativos y Comunidades*);
- (4) The governance board in Santa Victoria Este (in the north of Salta province);
- (5) The national board on climate change, whose composition we assessed through the institutional website of the Ministry of Agroindustry.

This last forum is relevant based on ongoing discussions taking place there regarding an action plan on native forests and climate change, linked with the United Nations Programme on Reducing Emissions from Deforestation and forest Degradation in developing countries, or UN-REDD.

### Supplementary material 2 List of organizations interviewed present in the sample with acronym

|                                                                                                    |
|----------------------------------------------------------------------------------------------------|
| Asociación Salteña de Ingenieros -Agrónomos - ASIA                                                 |
| Ministerio de Asuntos Indígenas y Desarrollo Comunitario - Unidad Ejecutora Provincial Salta - UEP |
| Servicio Nacional de Sanidad y Calidad Agroalimentaria - SENASA                                    |
| Sub-secretaria desarrollo rural del Ministerio de Asuntos indígenas de la Provincia de Salta - MAI |
| 20 de septiembre - vintes                                                                          |
| Administración Parques Nacionales Delegación Salta – APN                                           |
| Agencia de Protección Ambiental de Salta - APAS                                                    |
| Asociación Argentina de Productores en Siembra Directa - Aapresid                                  |

|                                                                                                   |
|---------------------------------------------------------------------------------------------------|
| Asociación de Consorcios de Usuarios de Riego - ACUR                                              |
| Asociación de Productores Foresto Industriales y Comerciales de la Provincia de Salta - APROFICSA |
| Asociación de Profesionales de Recursos Naturales y Medio Ambiente -APREMA                        |
| ASOCIANA                                                                                          |
| Bosques y Comunidades (UEL Salta) - ByC                                                           |
| Cámara de Diputados de la provincia de Salta - dip                                                |
| Cámara de Senadores de la provincia de Salta - sen                                                |
| Cámara Regional de la Producción de Salta - Camsalta                                              |
| Cancillería - canc                                                                                |
| Centro de Estudios Legales y Sociales -CELS                                                       |
| Centro de Obreros del Norte - CON                                                                 |
| Comisión Económica para América Latina y el Caribe -CEPAL                                         |
| CONICET                                                                                           |
| Consejo Económico y Social de la Provincia de Salta - CESS                                        |
| Consejo Empresario Argentino para el Desarrollo Sostenible - CEADS                                |
| Consejo Federal de Medio Ambiente- COFEMA                                                         |
| COPAIPA Salta - COPAIPA                                                                           |
| Corte Interamericana de derechos humanos - CIDH                                                   |
| Dirección de Bosques Nación de la Secretaria de Ambiente de Nación - Bosque                       |
| Dirección general de planificación territorial de la secretaria de ambiente de Salta - OTBN       |
| Dirección Nacional de Cambio Climático de la Secretaria de Ambiente de Nación - Clima             |
| Dirección tierras fiscales (provincia de Salta) - TFS                                             |

|                                                                                                      |
|------------------------------------------------------------------------------------------------------|
| ETO provincial (Salta) - ETOp                                                                        |
| Federación de Entidades Rurales de Salta – FEDERSAL                                                  |
| Federación de Organizaciones Nucleadas de la Agricultura Familiar -FONAF                             |
| Foro Provincial de Agricultura Familiar del Chaco Salteño - forochocho                               |
| Fundación Ambiente y Recursos Naturales - FARN                                                       |
| Fundación Gran Chaco - granchaco                                                                     |
| Fundación para la Integración y Desarrollo - FID                                                     |
| Fundación Vida Silvestre Argentina - Vidasilv                                                        |
| FUNDAPAZ                                                                                             |
| Greenpeace - green                                                                                   |
| INAI – ETO Nación - ETON                                                                             |
| Instituto Nacional de Tecnología Agropecuaria - INTA                                                 |
| Instituto Nacional de Tecnología Industrial - INTI                                                   |
| Lhaka Honhat - lhaka                                                                                 |
| Organización Familias Criollas - OFC                                                                 |
| Programa de Áreas Protegidas de la secretaria de ambiente de Salta - Aprot                           |
| Programa Naciones Unidas para el Desarrollo Argentina - PNUD                                         |
| Programa ONU-REDD (Reducing emissions from deforestation and forest degradation) Argentina - ONUREDD |
| PROGRANO Salta - PROGRANO                                                                            |
| Proyungas - Proy                                                                                     |
| Real Frontera - RealF                                                                                |
| Redes Chaco - Redes                                                                                  |
| Secretaría de Agricultura Familiar de la Nación Delegación Salta – SAF                               |

|                                                                                                    |
|----------------------------------------------------------------------------------------------------|
| Secretaría de Asuntos Agrarios del Ministerio de ambiente, producción y trabajo de Salta - secragr |
| Sociedad Rural Salteña - larural                                                                   |
| Tepeyac - Tepey                                                                                    |
| Universidad Católica de Salta - UCASAL                                                             |
| Universidad Nacional de Salta - UNSA                                                               |
| Vecinos Unidos - VecinosUn                                                                         |

### Supplementary material 3 Data collection instrument used for the policy network survey (in Spanish)

Encuesta sobre procesos de gobernanza sobre cambio de uso del suelo y manejo sustentable de bosque

|                            |  |
|----------------------------|--|
| Numero de cuestionario     |  |
| Nombre de encuestador      |  |
| Fecha                      |  |
| Lugar                      |  |
| Hora inicio y fin encuesta |  |

#### 1. Información de contexto

- a) ¿Cómo se llama su organización?
- b) ¿Cuál es su rol en la organización?
  - Responsable;
  - Empleado;
  - área de relaciones públicas/comunicaciones
- c) ¿Qué tan importante es para su organización el cambio del uso del suelo y manejo sustentable de bosque en una escala de 1 a 7?
- d) ¿Qué porcentaje de recursos le dedica su organización al cambio del uso del suelo y manejo sustentable de bosque? *Si no sabe podría indicar cuanto importante de 0 a 3.*
  - Menos del 20% ☐
  - entre 20% y 50% ☐
  - más de 50% ☐
- e) ¿Cuáles son los principales financiadores de su organización? Se hay más que una organización podría me indicar en una escala de 0 a 3 la importancia de cada uno dellos
  - Gobierno nacional
  - Gobierno provincial
  - Fondos intergubernamentales internacionales
  - Donaciones nacionales
  - Donaciones internacionales
  - Fondos propios
  - Actividades comerciales

**Sección 1/3** Las visiones de su organización sobre cambio del uso del suelo y manejo sustentable de bosque y degradación ambiental y cambio climático

| Opinion<br>statement<br>acronym |                                                                                                                                       | De<br>acuerdo | Parcialmente<br>de acuerdo | Neutro | Parcialmente<br>en<br>desacuerdo | En<br>desacuerdo |
|---------------------------------|---------------------------------------------------------------------------------------------------------------------------------------|---------------|----------------------------|--------|----------------------------------|------------------|
| Statement1                      | El cambio del uso del suelo, que implica cambio ecológico, está ocurriendo en este momento de forma significativa en el Chaco salteño |               |                            |        |                                  |                  |
| Statement2                      | La degradación ambiental ocurre en este momento de forma significativa en el Chaco salteño                                            |               |                            |        |                                  |                  |
| Statement3                      | El manejo no sustentable de bosque está ocurriendo en este momento de forma significativa en el Chaco salteño                         |               |                            |        |                                  |                  |
| Statement4                      | El manejo no sustentable y la degradación ambiental son causas muy importantes para el cambio climático                               |               |                            |        |                                  |                  |
| Statement5                      | El cambio del uso del suelo que implica cambio ecológico es una causa muy importante para el cambio climático                         |               |                            |        |                                  |                  |
| Statement6                      | El cambio del uso del suelo y el manejo no sustentable de bosque traen más beneficios que                                             |               |                            |        |                                  |                  |

|            |                                                                                                                                                            |  |  |  |  |  |
|------------|------------------------------------------------------------------------------------------------------------------------------------------------------------|--|--|--|--|--|
|            | daños a la sociedad                                                                                                                                        |  |  |  |  |  |
| Statement7 | La competencia internacional y el crecimiento económico son más importantes que encontrar medidas contra el cambio climático y el cambio del uso del suelo |  |  |  |  |  |
| Statement8 | El gobierno pone demasiado esfuerzos en reducir el cambio del uso del suelo y la degradación ambiental                                                     |  |  |  |  |  |

Se quiere puede añadir más información sobre las perspectivas de su organización sobre manejo sustentable de bosque y cambio del uso del suelo y cambio climático

### Sección 2/3

Abajo se indican organizaciones que están relacionadas con las políticas sobre el cambio del uso del suelo y manejo sustentable de bosque. Por favor considere las siguientes preguntas cuando lea lista de organizaciones mencionadas abajo.

1. Indique aquellas organizaciones que son influyentes en la gobernanza de las políticas sobre el cambio del uso del suelo y manejo sustentable de bosque en una escala de 0 a 3.
2. Indique las organizaciones de las cuales su organización recibe información científica/técnica sobre el cambio del uso del suelo y manejo sustentable de bosque.
3. A veces una organización apoya una política para apoyar a otra organización. La otra organización también puede ofrecer apoyo a cambio. Por favor indique las organizaciones con las cuales su organización tiene este tipo de relación de largo plazo respecto a las políticas sobre cambio de uso del suelo y manejo sustentable de bosque.
4. Indique las organizaciones de las cuales su organización se ha reunido en el ultimo mes para discutir sobre cambio de uso del suelo y manejo sustentable de bosque

Instituciones gubernamentales provinciales y nacionales

|                                      | Influyente | Información científica/técnica | Relaciones de soporte mutuo | Reuniones |
|--------------------------------------|------------|--------------------------------|-----------------------------|-----------|
| Administración de Parques Nacionales |            |                                |                             |           |
| Cámara de Diputados                  |            |                                |                             |           |

|                                                                                                             |  |  |  |  |
|-------------------------------------------------------------------------------------------------------------|--|--|--|--|
| Cámara de Senadores                                                                                         |  |  |  |  |
| Cancillería                                                                                                 |  |  |  |  |
| Consejo Económico y Social de la Provincia de Salta                                                         |  |  |  |  |
| Consejo Federal de Medio Ambiente - COFEMA                                                                  |  |  |  |  |
| Dirección de Bosque – Bosque y Comunidad Unidad Ejecutora Local Salta                                       |  |  |  |  |
| Dirección nacional de Bosques, Ordenamiento Territorial y Suelos                                            |  |  |  |  |
| Dirección Nacional de Cambio Climático                                                                      |  |  |  |  |
| Dirección tierras fiscales de la provincia de Salta                                                         |  |  |  |  |
| INAI – ETO Nación                                                                                           |  |  |  |  |
| Instituto Nacional de Tecnología Agropecuaria - INTA                                                        |  |  |  |  |
| Instituto Nacional de Tecnología Industrial - INTI                                                          |  |  |  |  |
| Secretaría de Ambiente - Agencia de Protección Ambiental de Salta                                           |  |  |  |  |
| Secretaría de Ambiente - Programa de Áreas Protegidas en la Secretaría de Ambiente de Salta                 |  |  |  |  |
| Secretaría de Ambiente – Dirección general de planificación territorial                                     |  |  |  |  |
| Secretaría de Asuntos Agrarios del Ministerio de Ambiente y Producción Sustentable de la Provincia de Salta |  |  |  |  |
| Ministerio de Asuntos Indígenas y Desarrollo Comunitario - UEP                                              |  |  |  |  |
| Ministerio de Asuntos Indígenas y Desarrollo Comunitario – ETO provincial                                   |  |  |  |  |
| Ministerio de Asuntos Indígenas y Desarrollo Comunitario – Sub-secretaría desarrollo rural                  |  |  |  |  |
| Secretaría de Agricultura Familiar de la Nación - Delegación Salta                                          |  |  |  |  |
| Servicio Nacional de Sanidad y Calidad Agroalimentaria - SENASA                                             |  |  |  |  |

#### Universidades y centros de investigación

|                               | Influyente | Información científica/técnica | Relaciones de soporte mutuo | Reuniones |
|-------------------------------|------------|--------------------------------|-----------------------------|-----------|
| Universidad Nacional de Salta |            |                                |                             |           |
| Universidad Católica de Salta |            |                                |                             |           |
| CONICET                       |            |                                |                             |           |

|                                              |  |  |  |  |
|----------------------------------------------|--|--|--|--|
| Centro de Estudios Locales y Sociales - CELS |  |  |  |  |
|----------------------------------------------|--|--|--|--|

#### Organizaciones ambientales y sociales

|                                                                           | Influyente | Información científica/técnica | Relaciones de soporte mutuo | Reuniones |
|---------------------------------------------------------------------------|------------|--------------------------------|-----------------------------|-----------|
| ASOCIANA                                                                  |            |                                |                             |           |
| Federación de Organizaciones Nucleadas de la Agricultura Familiar - FONAF |            |                                |                             |           |
| Fundación Ambiente y Recursos Naturales                                   |            |                                |                             |           |
| Fundación Gran Chaco                                                      |            |                                |                             |           |
| Fundación para la Integración y Desarrollo                                |            |                                |                             |           |
| Fundación Vida Silvestre Argentina                                        |            |                                |                             |           |
| FUNDAPAZ                                                                  |            |                                |                             |           |
| Greenpeace                                                                |            |                                |                             |           |
| Lhaka Honhat                                                              |            |                                |                             |           |
| OFC - Organización de Familias Criollas                                   |            |                                |                             |           |
| Proyungas                                                                 |            |                                |                             |           |
| Real Frontera                                                             |            |                                |                             |           |
| Redes Chaco                                                               |            |                                |                             |           |
| 20 de septiembre                                                          |            |                                |                             |           |
| Tepeyac                                                                   |            |                                |                             |           |
| Vecinos Unidos                                                            |            |                                |                             |           |

#### Organizaciones de comercio y negocios

|                                                                                                   | Influyente | Información científica/técnica | Relaciones de soporte mutuo | Reuniones |
|---------------------------------------------------------------------------------------------------|------------|--------------------------------|-----------------------------|-----------|
| Asociación Argentina de Productores en Siembra Directa - Aapresid                                 |            |                                |                             |           |
| Asociación Salteña de Ingenieros Agrónomos - ASIA                                                 |            |                                |                             |           |
| Asociación de Productores Foresto Industriales y Comerciales de la Provincia de Salta - APROFICSA |            |                                |                             |           |
| Asociación de Consorcios de Usuarios de Riego                                                     |            |                                |                             |           |
| Asociación de Profesionales de Recursos Naturales y Medio Ambiente - APREMA                       |            |                                |                             |           |



|                                                                                 |  |  |  |  |
|---------------------------------------------------------------------------------|--|--|--|--|
| Cámara Regional de la Producción de Salta                                       |  |  |  |  |
| Centro de Obreros del Norte                                                     |  |  |  |  |
| Consejo Empresario Argentino para el Desarrollo Sostenible (CEADS)              |  |  |  |  |
| Consejo Profesional de Agrimensores, Ingenieros y Asociaciones Afines - COPAIPA |  |  |  |  |
| Federación de Entidades Rurales de Salta - FEDERSAL                             |  |  |  |  |
| Foro Provincial de Agricultura Familiar del Chaco Salteño                       |  |  |  |  |
| PROGRANO                                                                        |  |  |  |  |
| Sociedad Rural Salteña                                                          |  |  |  |  |

#### Organizaciones intergubernamentales

|                                                    | Influyente | Información científica/técnica | Relaciones de soporte mutuo | Reuniones |
|----------------------------------------------------|------------|--------------------------------|-----------------------------|-----------|
| Comisión Económica para América Latina y el Caribe |            |                                |                             |           |
| Corte Interamericana de Justicia                   |            |                                |                             |           |
| PNUD Argentina                                     |            |                                |                             |           |
| ONU-REDD                                           |            |                                |                             |           |

#### Sección 3/3

¿Hasta que punto las siguientes herramientas previstas por las políticas sobre el cambio del uso del suelo y manejo sustentable de bosque contribuyen de forma significativa a enfrentar el cambio climático? Por favor evalúe el asunto partiendo de la imagen que tiene de la visión de su organización.

| Opinion statement acronym |                                                              | De acuerdo | Parcialmente de acuerdo | Neutro | Parcialmente en desacuerdo | En desacuerdo |
|---------------------------|--------------------------------------------------------------|------------|-------------------------|--------|----------------------------|---------------|
| Statement9                | Estrategias de reforestación                                 |            |                         |        |                            |               |
| Statement10               | Fondos económicos para la conservación y el manejo de bosque |            |                         |        |                            |               |

|             |                                                                              |  |  |  |  |  |
|-------------|------------------------------------------------------------------------------|--|--|--|--|--|
|             | estipulados por la ley 26133                                                 |  |  |  |  |  |
| Statement11 | Multas más altas para los proyectos de deforestación ilegales                |  |  |  |  |  |
| Statement12 | Regularización de la situación dominial de comunidades indígenas y criollas  |  |  |  |  |  |
| Statement13 | Finalización del proceso de relevamiento indígena previsto por la ley 26.160 |  |  |  |  |  |
| Statement14 | Finalización el proceso de relevamiento criollo previsto por la ley 7.658    |  |  |  |  |  |

#### Sección 4: Riesgo, políticas ambientales y de regularización dominial

1. ¿Cómo valora las presentes políticas sobre cambio de uso del suelo y manejo sustentable de bosque?
2. ¿Usted cree que son posibles cambios en estas políticas y cómo influiría en el trabajo de su organización un cambio de la legislación vigente sobre cambio de uso del suelo y manejo sustentable de bosque?
3. ¿Cómo influyen riesgos, que están por encima del control de los actores individuales, entendido como la inestabilidad política y económica, cambios en las condiciones internacionales y locales (de mercado, climáticas y económicas), en la implementación de las políticas actuales y en el diseño de políticas futuras sobre cambio de uso del suelo y manejo sustentable de bosque?
4. ¿Cómo influye el riesgo en el sistema socio ambiental en la implementación de las políticas actuales en el diseño de políticas futuras sobre cambio de uso del suelo y manejo sustentable de bosque?
5. ¿Cómo la regularización dominial afecta los procesos de cambio de uso del suelo y de degradación ambiental?
6. ¿Cómo las leyes 26.160 y 7.658 contribuyen en solucionar la regularización dominial en el Chaco salteño?
7. ¿Cuales son los factores claves que influyen para que los pobladores indígenas y criollos del Chaco consigan la titulación de las tierras?
8. ¿Qué papel tienen los liderazgos locales en el proceso de reclamos para la titulación de la tierra de los pobladores del Chaco salteño?
9. ¿Cuál es el rol y la estrategia de las organizaciones indígenas y criollas en el reconocimiento de los derechos sobre la tierra de los pobladores del Chaco salteño?

10. ¿Considera que la ley de bosques actualizó los vínculos entre los actores referidos en la encuesta y de qué forma?

**Supplementary material 4 Participation in policy forums of the actors interviewed**

|                                      | Total | Interviewed |
|--------------------------------------|-------|-------------|
| Organization members of no forum     | 6     | 5           |
| Organization members of one forum    | 18    | 11          |
| Organization members of two forums   | 20    | 20          |
| Organization members of three forums | 10    | 10          |
| Organization members of four forums  | 2     | 2           |
| Organization members of five forums  | 2     | 2           |
| Organization members of seven forums | 1     | 1           |
| Total no. of institutions            | 59    | 52          |

**Funding:**

This research was funded by the European Research Council (ERC), grant number 681518.

**Acknowledgments**

The authors would like to thank Anu Lannen for English editing of the manuscript.

**Author Contributions:**

Carla Inguaggiato: Conceptualization, Methodology; Formal Analysis, Investigation, Writing – Review & Editing

Graziano M. Ceddia: Writing – Review & Editing, Supervision; Project Administration; Funding Acquisition

Maurice Tschopp: Writing – Review & Editing

Dimitris Christopoulos: Methodology; Formal Analysis, Investigation, Writing – Review & Editing; Supervision

## Conflicts of Interest

The authors declare that they have no known competing financial interests or personal relationships that could have appeared to influence the work reported in this paper.

## References

- Aguiar, S., Mastrangelo\*, M. E., Collazo, M. A. G., Sans, G. H. C., Mosso, C. E., Ciuffoli, L., Schmidt, M., Vallejos, M., Langbehn, L., Brassiolo, M., Cáceres, D., Merlinsky, G., Paruelo, J. M., Seghezzo, L., Staiano, L., Texeira, M., Volante, J. N., & Verón, S. R. (2018). ¿Cuál es la situación de la Ley de Bosques en la Región Chaqueña a diez años de su sanción? Revisar su pasado para discutir su futuro. *Ecología Austral*, 28(2), 400–417.
- Alcañiz, I., & Gutierrez, R. A. (2019). Between the Global Commodity Boom and Subnational State Capacities: Payment for Environmental Services to Fight Deforestation in Argentina. *Global Environmental Politics*, 20(1), 38–59. [https://doi.org/10.1162/glep\\_a\\_00535](https://doi.org/10.1162/glep_a_00535)
- Ansell, C., & Gash, A. (2008). Collaborative Governance in Theory and Practice. *Journal of Public Administration Research and Theory*, 18(4), 543–571. <https://doi.org/10.1093/jopart/mum032>
- Barboza, A. G. J. S., Pocoví, J. M. C., Venencia, C., Huaranca, L. L., Agüero, J. L., Iribarnegaray, M. A., Escosteguy, M., Volante, J. N., & Seghezzo, L. (2019). Ten years of contested enforcement of the Forest Law in Salta, Argentina. The role of land-change science and political ecology. *Journal of Land Use Science*, 0(0), 1–14. <https://doi.org/10.1080/1747423X.2019.1646333>
- Baumann, M., Piquer-Rodríguez, M., Fehlenberg, V., Gavier Pizarro, G., & Kuemmerle, T. (2016). Land-Use Competition in the South American Chaco. In J. Niewöhner, A. Bruns, P. Hostert, T. Krueger, J. Ø. Nielsen, H. Haberl, C. Lauk, J. Lutz, & D. Müller (Eds.), *Land Use Competition: Ecological, Economic and Social Perspectives* (pp. 215–229). Springer International Publishing. [https://doi.org/10.1007/978-3-319-33628-2\\_13](https://doi.org/10.1007/978-3-319-33628-2_13)
- Boletta, P. E., Ravelo, A. C., Planchuelo, A. M., & Grilli, M. (2006). Assessing deforestation in the Argentine Chaco. *Forest Ecology and Management*, 228(1), 108–114. <https://doi.org/10.1016/j.foreco.2006.02.045>
- Borgatti, S. P., & Everett, M. G. (2000). Models of core/periphery structures. *Social Networks*, 21(4), 375–395.
- Borgatti, S.P., Everett, M.G. and Freeman, L.C. (2002). *Ucinet for Windows: Software for Social Network Analysis*. Analytic Technologies.
- Cáceres, D. M., Silvetti, F., & Díaz, S. (2016). The rocky path from policy-relevant science to policy implementation—A case study from the South American Chaco. *Current Opinion in Environmental Sustainability*, 19, 57–66. <https://doi.org/10.1016/j.cosust.2015.12.003>

- Ceddia, M. G., & Zepharovich, E. (2017). Jevons paradox and the loss of natural habitat in the Argentinean Chaco: The impact of the indigenous communities' land titling and the Forest Law in the province of Salta. *Land Use Policy*, 69, 608–617. <https://doi.org/10.1016/j.landusepol.2017.09.044>
- Christopoulos, D. (2017). Governance Networks in Politics. In B. Hollstein, W. Matiaske, & K.-U. Schnapp (Eds.), *Networked Governance: New Research Perspectives* (pp. 55–70). Springer International Publishing. [https://doi.org/10.1007/978-3-319-50386-8\\_4](https://doi.org/10.1007/978-3-319-50386-8_4)
- Clapp, J., & Dauvergne, P. (2011). *Paths to a Green World: The Political Economy of the Global Environment*. The MIT Press; JSTOR. <https://doi.org/10.2307/j.ctt5hhcr3>
- de Amorim, S. G., Barthélemy, J.-P., & Ribeiro, C. C. (1992). Clustering and clique partitioning: Simulated annealing and tabu search approaches. *Journal of Classification*, 9(1), 17–41. <https://doi.org/10.1007/BF02618466>
- Di Gregorio, M., Fatorelli, L., Paavola, J., Locatelli, B., Pramova, E., Nurrochmat, D. R., May, P. H., Brockhaus, M., Sari, I. M., & Kusumadewi, S. D. (2019). Multi-level governance and power in climate change policy networks. *Global Environmental Change*, 54, 64–77. <https://doi.org/10.1016/j.gloenvcha.2018.10.003>
- Durand, L., Nygren, A., & de la Vega-Leinert, A. C. (Eds.). (2019). *Naturaleza y neoliberalismo en América Latina*. Universidad Nacional Autónoma de México, Centro Regional de Investigaciones Multidisciplinarias. <https://doi.org/10.22201/crim.9786073022231e.2019>
- Everett, M., & Borgatti, S. (2012). Categorical attribute based centrality: E-I and G-F centrality. *Soc. Networks*. <https://doi.org/10.1016/j.socnet.2012.06.002>
- Fernández Milmanda, B., & Garay, C. (2019). Subnational variation in forest protection in the Argentine Chaco. *World Development*, 118, 79–90. <https://doi.org/10.1016/j.worlddev.2019.02.002>
- Fernández-Milmanda, B., & Garay, C. (2020). The Multilevel Politics of Enforcement: Environmental Institutions in Argentina—Belén Fernández Milmanda, Candelaria Garay. <https://journals.sagepub.com/doi/full/10.1177/0032329219894074>
- Granovetter, M. S. (1973). The strength of weak ties. *American Journal of Sociology*, 1360–1380.
- Grau, H. R., Gasparri, N. I., & Aide, T. M. (2008). Balancing food production and nature conservation in the Neotropical dry forests of northern Argentina. *Global Change Biology*, 14(5), 985–997. <https://doi.org/10.1111/j.1365-2486.2008.01554.x>
- Gronow, A., & Yla-Anttila, T. (2019). Cooptation of ENGOs or Treadmill of Production? Advocacy Coalitions and Climate Change Policy in Finland. Vol. 00(No. 00, 2016). <https://onlinelibrary.wiley.com/doi/full/10.1111/psj.12185>
- Huaranca, L. L., Iribarnegaray, M. A., Albesa, F., Volante, J. N., Brannstrom, C., & Seghezzo, L. (2019). Social Perspectives on Deforestation, Land Use Change, and Economic Development in an Expanding Agricultural Frontier in Northern Argentina. *Ecological Economics*, 165, 106424. <https://doi.org/10.1016/j.ecolecon.2019.106424>
- Hufty, M. (2008). Pizarro Protected Area: A Political Ecology Perspective on Land Use, Soybeans and Argentina's Nature Conservation Policy (SSRN Scholarly Paper ID 1686390). Social Science Research Network. <https://papers.ssrn.com/abstract=1686390>

Ingold, K., & Leifeld, P. (2016). Structural and Institutional Determinants of Influence Reputation: A Comparison of Collaborative and Adversarial Policy Networks in Decision Making and Implementation. *Journal of Public Administration Research and Theory*, 26(1), 1–18. <https://doi.org/10.1093/jopart/muu043>

James, S., & Christopoulos, D. (2018). Reputational leadership and preference similarity: Explaining organisational collaboration in bank policy networks. *European Journal of Political Research*, 57(2), 518–538. <https://doi.org/10.1111/1475-6765.12237>

Keeley, J., & Scoones, I. (2014). *Understanding Environmental Policy Processes: Cases from Africa*. Routledge.

Knoke, D. (1990). Networks of Political Action: Toward Theory Construction. *Social Forces*, 68(4), 1041–1063. <https://doi.org/10.2307/2579133>

Kröger, M., & Nygren, A. (2020). Shifting frontier dynamics in Latin America. *Journal of Agrarian Change*, 20(3), 364–386. <https://doi.org/10.1111/joac.12354>

Kuemmerle, T., Altrichter, M., Baldi, G., Cabido, M., Camino, M., Cuellar, E., Cuellar, R. L., Decarre, J., Díaz, S., Gasparri, I., Gavier-Pizarro, G., Ginzburg, R., Giordano, A. J., Grau, H. R., Jobbágy, E., Leynaud, G., Macchi, L., Mastrangelo, M., Matteucci, S. D., ... Zak, M. (2017). Forest conservation: Remember Gran Chaco. *Science*, 355(6324), 465–465. <https://doi.org/10.1126/science.aal3020>

Lambin, E. F., & Meyfroidt, P. (2011). Global land use change, economic globalization, and the looming land scarcity. *Proceedings of the National Academy of Sciences of the United States of America*, 108(9), 3465–3472. <https://doi.org/10.1073/pnas.1100480108>

Langbehn, L. (2016). Arenas públicas, modelos de desarrollo y políticas de protección del ambiente: La Ley de Bosques entre ‘conservación’ y ‘producción.’ In G. Merlinsky (Ed.), *Cartografías del conflicto ambiental en Argentina II* (pp. 141–168). Ediciones CICCUS CLACSO. <https://go.openathens.net/redirector/umoncton.ca?url=https://www.jstor.org/stable/10.2307/j.ctvt6rkxj>

Mastrangelo, M. E., & Aguiar, S. (2019). Are Ecological Modernization Narratives Useful for Understanding and Steering Social-Ecological Change in the Argentine Chaco? *Sustainability*, 11(13), 3593. <https://doi.org/10.3390/su11133593>

Naharro, N., Alvarez, M. A., & Flores Klarik, M. (2010). Territorios en disputa: Reflexiones acerca de los discursos que legitiman la propiedad de la tierra en el Chaco salteño. In M. Manzanal & F. Villarreal (Eds.), *El desarrollo y sus lógicas en disputa en territorios del norte argentino* (9871599048 edition). Ciccus. <https://doi.org/10.4067/S0250-71612010000300008>

Nolte, C., Gobbi, B., le Polain de Waroux, Y., Piquer-Rodríguez, M., Butsic, V., & Lambin, E. F. (2018). Challenges in Attributing Avoided Deforestation to Policies and Actors: Lessons From Provincial Forest Zoning in the Argentine Dry Chaco. *Ecological Economics*, 150, 346–352. <https://doi.org/10.1016/j.ecolecon.2018.03.010>

Ocelík, P., Svobodová, K., Hendrychová, M., Lehotský, L., Everingham, J.-A., Ali, S., Badera, J., & Lechner, A. (2019). A contested transition toward a coal-free future: Advocacy coalitions and coal policy in the Czech Republic. *Energy Research & Social Science*, 58, 101283. <https://doi.org/10.1016/j.erss.2019.101283>

Padgett, J. F., & Ansell, C. K. (1993). Robust Action and the Rise of the Medici, 1400–1434. *American Journal of Sociology*, 1259–1319.

Patrouilleau, M., & Mioni, W. (2017). Políticas públicas en la ruralidad argentina. Ediciones INTA, Instituto de prospectiva y políticas públicas.

Robins, G. (2015). *Doing Social Network Research: Network-based Research Design for Social Scientists*. SAGE.

Sarmiento Barletti, J. P., & Larson, A. M. (2019, May 4). The role of multi-stakeholder forums in subnational jurisdictions: Framing literature review for in-depth field research. CIFOR; Center for International Forestry Research (CIFOR). <https://doi.org/10.17528/cifor/007150>

Schmidt, M. (2015). (Des)ordenamientos territoriales salteños. Una aproximación al contexto previo al Ordenamiento Territorial de Bosques Nativos en la provincia de Salta. <https://www.mundoagrario.unlp.edu.ar/article/view/MAv15n28a12/5583>

Schmidt, M. A. (2014). 'Ordenadores y ordenados'. Actores en disputa en el ordenamiento territorial de bosques nativos en la provincia de Salta. *Cuadernos de Antropología*, 0(11), 37–55.

Seghezzo, L., Volante, J. N., Paruelo, J. M., Somma, D. J., Buliubasich, E. C., Rodríguez, H. E., Gagnon, S., & Hufty, M. (2011). Native Forests and Agriculture in Salta (Argentina): Conflicting Visions of Development. *The Journal of Environment & Development*, 20(3), 251–277. JSTOR.

Tanentzap, A. J., Lamb, A., Walker, S., & Farmer, A. (2015). Resolving Conflicts between Agriculture and the Natural Environment. *PLOS Biology*, 13(9), e1002242. <https://doi.org/10.1371/journal.pbio.1002242>

Volante, José N., Mosciaro, M. J., Gavier-Pizarro, G. I., & Paruelo, J. M. (2016). Agricultural expansion in the Semiarid Chaco: Poorly selective contagious advance. *Land Use Policy*, 55, 154–165. <https://doi.org/10.1016/j.landusepol.2016.03.025>

Volante, José Norberto, & Seghezzo, L. (2018). Can't See the Forest for the Trees: Can Declining Deforestation Trends in the Argentinian Chaco Region be Ascribed to Efficient Law Enforcement? <https://www.sciencedirect.com/science/article/pii/S0921800917307668>

Weible, Ingold, Nohrstedt, & Jenkins-Smith. (2019). Sharpening Advocacy Coalitions. <https://onlinelibrary.wiley.com/doi/full/10.1111/psj.12360>

Zepharovich, E., Ceddia, M. G., & Rist, S. (2020). Perceptions of deforestation in the Argentinean Chaco: Combining Q-method and environmental justice. *Ecological Economics*, 171, 106598. <https://doi.org/10.1016/j.ecolecon.2020.106598>
